# Supplementary material for: Application of Genomic Sequencing to Refine Patient Stratification for Adjuvant Therapy in Renal Cell Carcinoma
Source: PubMed Central journal article supplement — Clin Cancer Res. 2023 Feb 23;29(7):1220–31. doi: 10.1158/1078-0432.CCR-22-1936 (PMC10068441; doi:10.1158/1078-0432.ccr-22-1936), 2023-02-23
Supplement: ccr-22-1936_figure_s1_suppfs1.pdf [file ccr-22-1936_figure_s1_suppfs1.pdf]

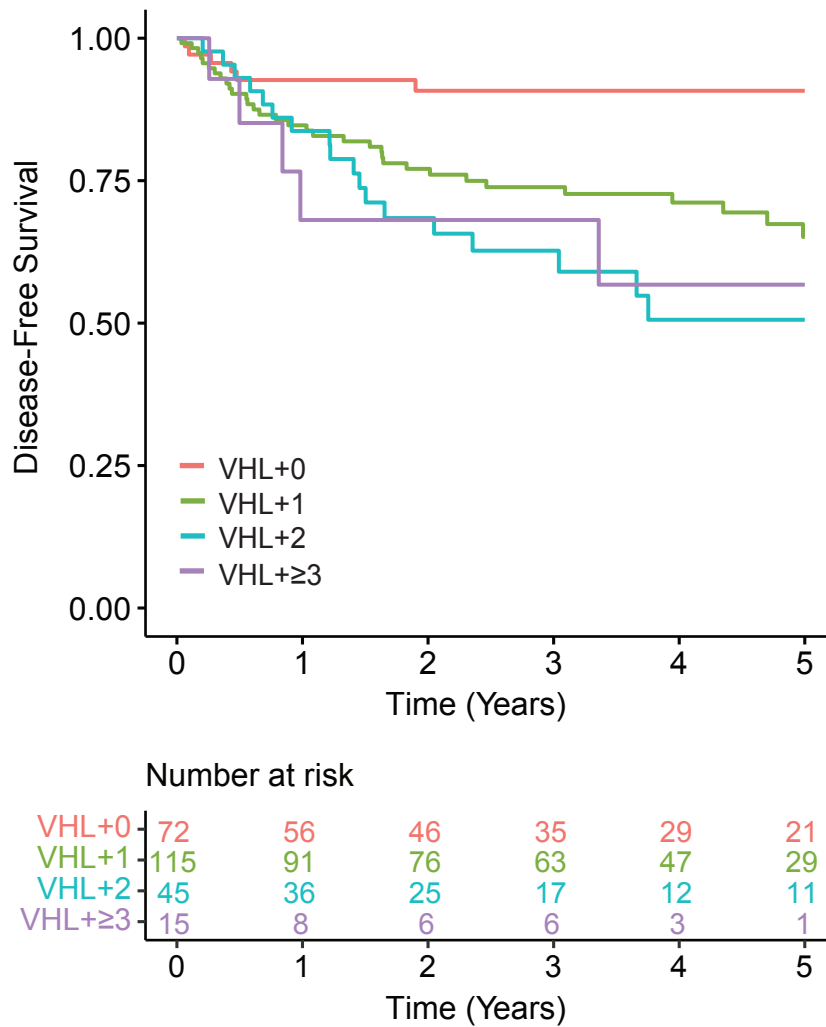

**Supplementary Figure S1. Disease-Free Survival outcomes amongst genomic groups when applied to the 247 *VHL* mutated ccRCCs from the TCGA dataset.**
