# Supplementary material for: Application of Genomic Sequencing to Refine Patient Stratification for Adjuvant Therapy in Renal Cell Carcinoma
Source: PubMed Central journal article supplement — Clin Cancer Res. 2023 Feb 23;29(7):1220–31. doi: 10.1158/1078-0432.CCR-22-1936 (PMC10068441; doi:10.1158/1078-0432.ccr-22-1936), 2023-02-23
Supplement: ccr-22-1936_figure_s2_suppfs2.pdf [file ccr-22-1936_figure_s2_suppfs2.pdf]

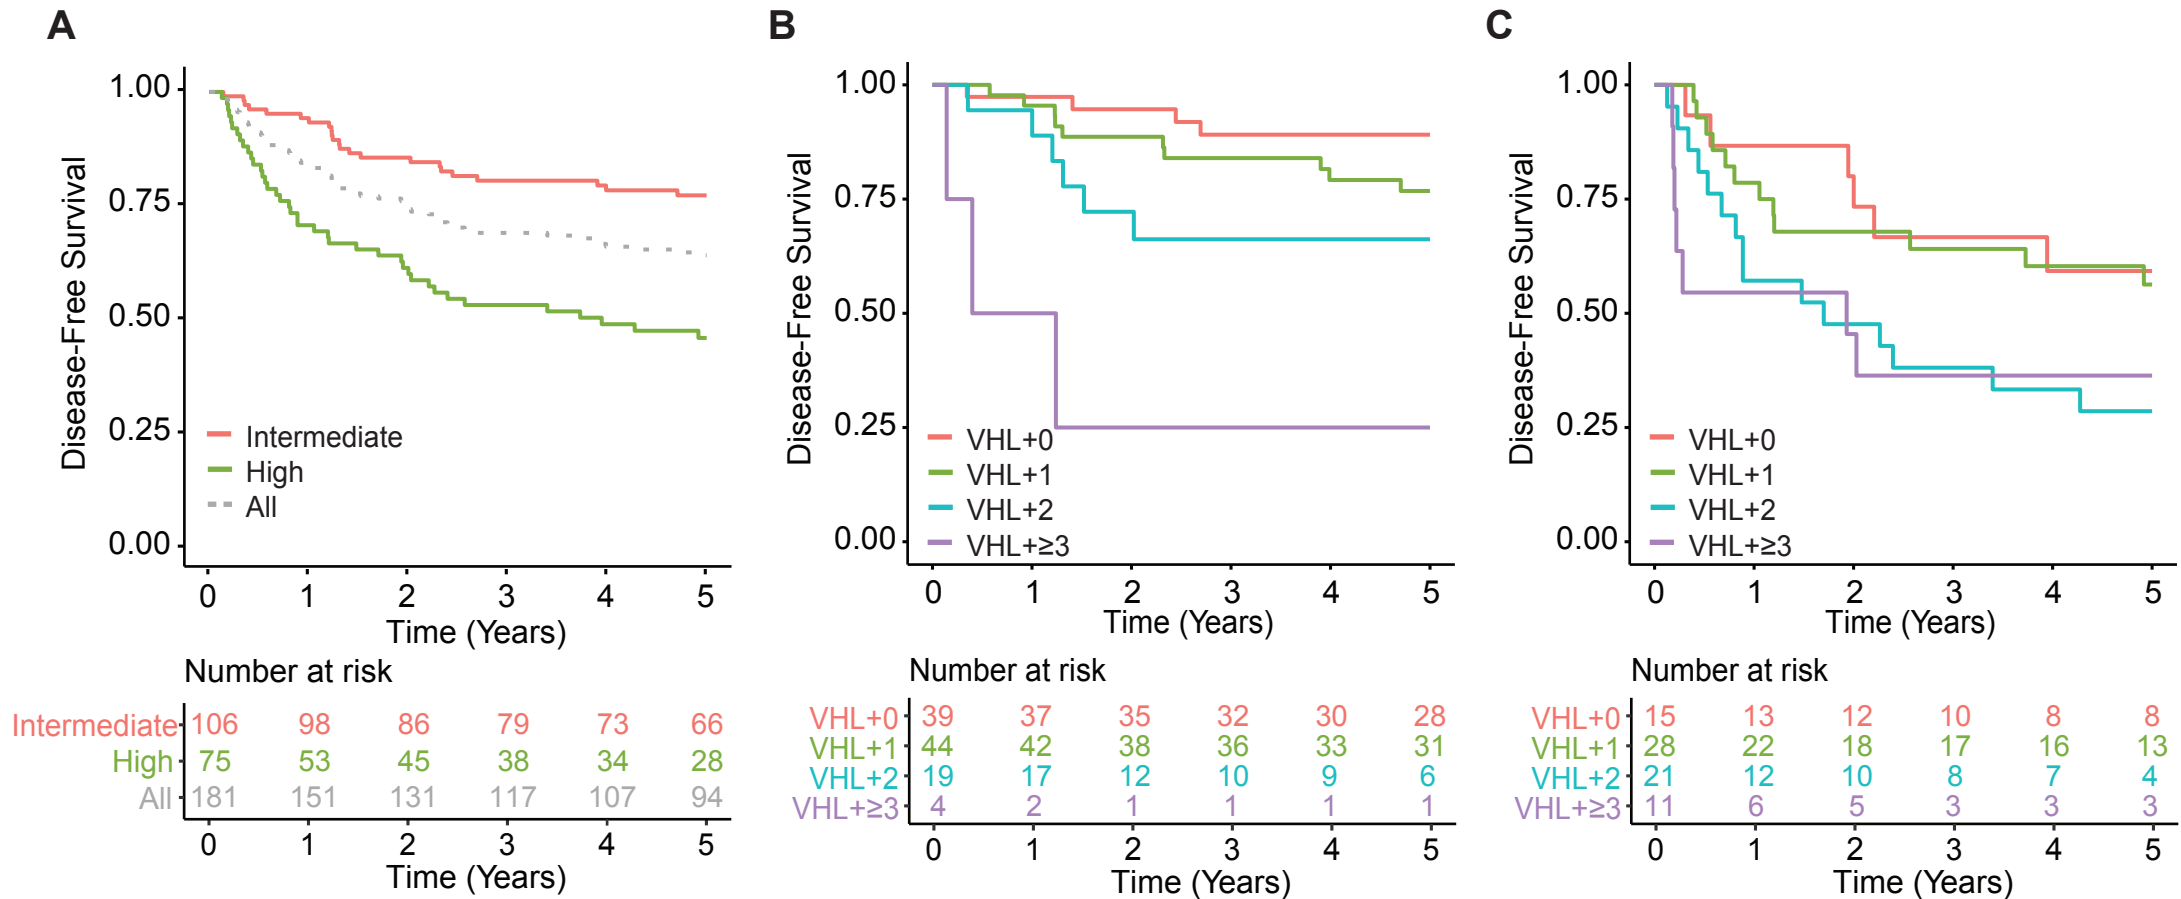

**Supplementary Figure S2. Disease-Free Survival amongst Leibovich risk groups stratified by genomic classifier.** Kaplan Meier survival curves amongst A) All eligible adjuvant patients by Leibovich intermediate- or high-risk group, B) Leibovich intermediate-risk patients stratified by genomic group, and C) Leibovich high-risk patients stratified by genomic group.
