# Supplementary material for: Application of Genomic Sequencing to Refine Patient Stratification for Adjuvant Therapy in Renal Cell Carcinoma
Source: PubMed Central journal article supplement — Clin Cancer Res. 2023 Feb 23;29(7):1220–31. doi: 10.1158/1078-0432.CCR-22-1936 (PMC10068441; doi:10.1158/1078-0432.ccr-22-1936), 2023-02-23
Supplement: ccr-22-1936_figure_s3_suppfs3.pdf [file ccr-22-1936_figure_s3_suppfs3.pdf]

**A**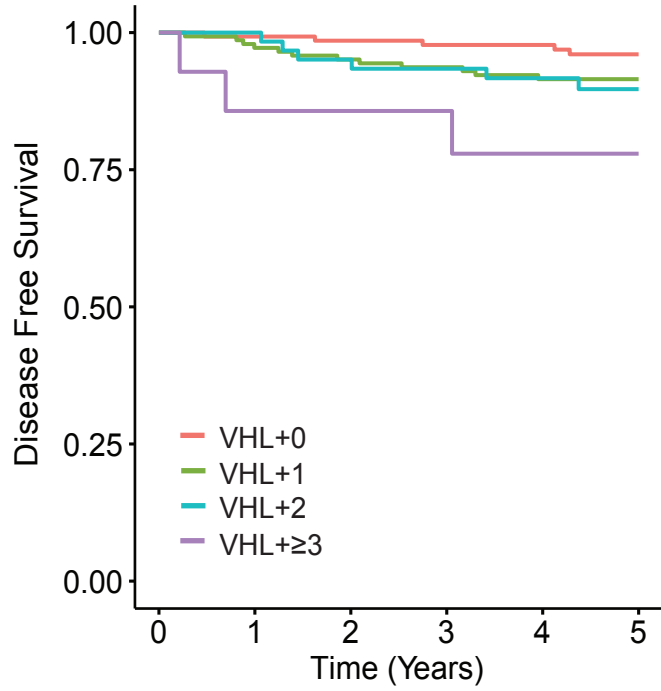

Number at risk

|        | 0   | 1   | 2   | 3   | 4   | 5   |
|--------|-----|-----|-----|-----|-----|-----|
| VHL+0  | 140 | 136 | 129 | 124 | 115 | 101 |
| VHL+1  | 146 | 139 | 135 | 131 | 124 | 113 |
| VHL+2  | 63  | 61  | 57  | 55  | 46  | 42  |
| VHL+≥3 | 16  | 12  | 11  | 11  | 10  | 10  |

**B**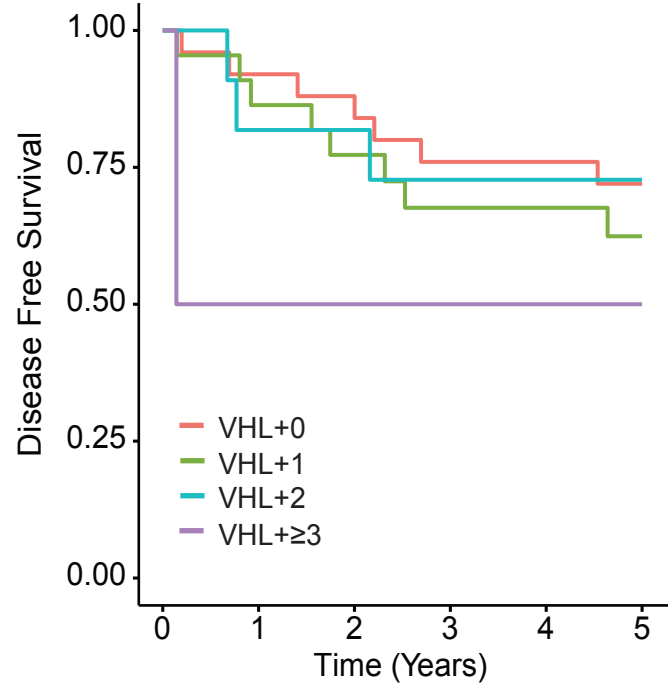

Number at risk

|        | 0  | 1  | 2  | 3  | 4  | 5  |
|--------|----|----|----|----|----|----|
| VHL+0  | 26 | 23 | 22 | 19 | 19 | 18 |
| VHL+1  | 22 | 19 | 17 | 14 | 13 | 12 |
| VHL+2  | 11 | 9  | 9  | 8  | 6  | 4  |
| VHL+≥3 | 2  | 1  | 1  | 1  | 1  | 1  |

**C**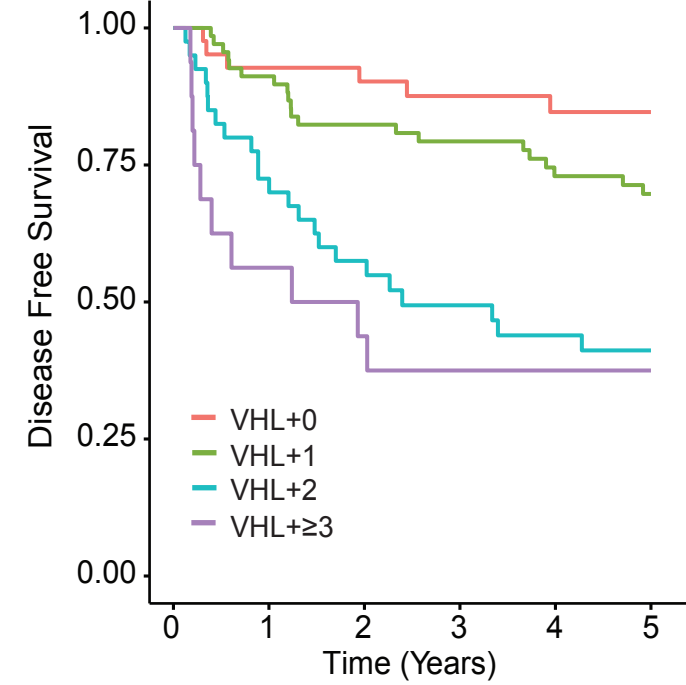

Number at risk

|        | 0  | 1  | 2  | 3  | 4  | 5  |
|--------|----|----|----|----|----|----|
| VHL+0  | 42 | 38 | 35 | 33 | 29 | 27 |
| VHL+1  | 68 | 62 | 54 | 51 | 46 | 41 |
| VHL+2  | 41 | 29 | 22 | 18 | 16 | 12 |
| VHL+≥3 | 16 | 9  | 7  | 5  | 5  | 5  |

**Supplementary Figure S3. Disease-Free Survival by tumor stage stratified by genomic classifier.**

Kaplan Meier survival curves for A) Stage I, B) Stage II, and C) Stage III tumors.
